# Supplementary material for: Plasma proteomic analysis reveals altered protein abundances in cardiovascular disease
Source: J Transl Med. 2018 Apr 17;16:104. doi: 10.1186/s12967-018-1476-9 (PMC5905170; doi:10.1186/s12967-018-1476-9)
Supplement: Supplementary file 2 — Additional file 2. Pathway annotation results. Pathway (Cytoscape) analysis of the proteins identified in the discovery set. Pathways predicted based on proteins identified by at least two peptides are also shown. [file 12967_2018_1476_MOESM2_ESM.xls]

## Sheet: all IDs
GOTerm	Term PValue Corrected with Bonferroni	% Associated Genes	Nr. Genes	Associated Genes Found
Complement cascade	1.9e-10	63.1579	36	[C1QA, C1QB, C1QC, C1R, C1S, C2, C3, C4A, C4B, C4BPA, C4BPB, C5, C6, C7, C8A, C8B, C8G, C9, CFB, CFH, CFHR1, CFHR2, CFI, CFP, CLU, CPB2, CPN1, CPN2, CR1, CRP, F2, FCN3, MBL2, PROS1, SERPING1, VTN]
Laminin interactions	1.5e-07	57.1429	32	[COL18A1, COL1A1, COL1A2, COL27A1, COL4A4, COL4A5, COL4A6, COL5A1, COL7A1, CRK, CRKL, DOCK7, FN1, GAB1, HSPG2, ITGA1, ITGA3, ITGA7, ITGB1, ITGB4, LAMA1, LAMA2, LAMA4, LAMA5, LAMB3, LAMC1, LAMC2, LAMC3, PTK2, RAPGEF1, TNS3, TNS4]
Signalling by NGF	2.8e-06	14.2279	211	[ADAM17, ADCY2, ADCY4, ADCY9, ADGRE1, ADRA1D, AGO2, AGT, AHCYL1, AKAP9, APP, ARAF, ARHGEF10, ARHGEF10L, ARHGEF11, ARHGEF17, ARHGEF18, ARHGEF19, ARHGEF3, ATN1, BAD, C3, C5, CALCR, CAMK2D, CASP3, CBX8, CCKAR, CCKBR, CCR7, CD86, CDKN1A, CDKN1B, CHD3, CHRM3, CHUK, CNKSR2, CRK, CRKL, CSK, CSNK2A1, CUL3, CXCL16, DGKG, DUSP16, DUSP5, DUSP8, ERBB2, EZH2, F2, F2R, FGA, FGB, FGD1, FGD2, FGD4, FGF2, FGF7, F…
Class B/2 (Secretin family receptors)	4.3e-06	9.89011	45	[ADGRE1, ADRA1D, AGT, APP, C3, C5, CALCR, CCKAR, CCKBR, CCR7, CHRM3, CXCL16, F2, F2R, GABBR2, GCG, GPR18, GPR68, GRM1, GRM4, HCRTR1, KNG1, LHCGR, NMUR1, NPY1R, NPY2R, P2RY12, P2RY13, POMC, PTH2R, SAA1, SCTR, SSTR2, SSTR5, TAAR1, TAAR9, TAS1R3, TAS2R10, TAS2R4, TRH, WNT1, WNT11, WNT5A, WNT6, WNT7B]
Scavenging of heme from plasma	9.6e-06	92.3077	12	[ALB, AMBP, APOA1, APOL1, CD163, HBA1, HBB, HP, HPR, HPX, JCHAIN, LRP1]
Intrinsic Pathway of Fibrin Clot Formation	1.9e-05	58.9744	23	[A2M, F10, F11, F12, F13A1, F13B, F2, F2R, F3, F5, F8, F9, FGA, FGB, FGG, KLKB1, KNG1, PROS1, SERPINC1, SERPIND1, SERPING1, TFPI, VWF]
Degradation of the extracellular matrix	4.6e-05	32.2148	96	[A2M, ACTN1, ADAM10, ADAM12, ADAM17, ADAM19, ADAMTS1, ADAMTS18, ADAMTS2, ADAMTS3, ADAMTS4, ADAMTS5, ADAMTS8, ADAMTS9, AGRN, APP, BMP7, CAPN12, CAPN13, CAPN7, CAPNS1, CASP3, CDH1, CEACAM6, COL10A1, COL18A1, COL1A1, COL1A2, COL22A1, COL23A1, COL27A1, COL4A4, COL4A5, COL4A6, COL5A1, COL6A6, COL7A1, COL8A1, COMP, CTSK, CTSL, DDR1, DMD, DSPP, FBLN1, FBN1, FBN2, FBN3, FGA, FGB, FGF2, FGG, FN1, HSPG2, I…
Platelet degranulation	0.00031	38.4	48	[A1BG, A2M, ACTN1, AHSG, ALB, ANXA5, APOA1, APOH, APOOL, APP, CLEC3B, CLU, ECM1, F13A1, F5, F8, FGA, FGB, FGG, FN1, GTPBP2, HRG, HSPA5, ITGB3, ITIH3, ITIH4, KNG1, LGALS3BP, MAGED2, ORM1, ORM2, PHACTR2, PLG, PROS1, SELENOP, SERPINA1, SERPINA3, SERPINA4, SERPINF2, SERPING1, STXBP2, TEX264, TF, TTN, TUBA4A, VEGFC, VEGFD, VWF]
Metabolism	0.00042	15.8382	325	[AADAT, AASDHPPT, AASS, ABCB4, ABCC1, ABCC5, ABCD1, ACACA, ACACB, ACAT1, ACHE, ACLY, ACOT11, ACOT9, ACOX2, ACOX3, ACOXL, ACSL3, ACSL5, ADCY2, ADCY4, ADCY9, ADSL, AGPS, AGRN, AGT, AHCYL1, AHRR, AK6, AK9, AKR1B10, AKR1C3, AKR7A2, ALAS1, ALB, ALDH3A1, ALDH9A1, ALDOB, AMPD1, AMPD3, AOX1, APIP, APOA1, APOA2, APOB, APOC2, APOC3, APOE, APOM, ARF1, ARNT, ARNT2, ARNTL, AS3MT, ASL, ASNS, ATP5S, B4GALT2, BC…
Terminal pathway of complement	0.00063	100	8	[C5, C6, C7, C8A, C8B, C8G, C9, CLU]
L1CAM interactions	0.002	27.1758	153	[ABLIM1, ABLIM2, ADAM10, AGAP2, AGRN, AKAP9, ANK2, ANK3, ARAF, ARHGEF11, ARHGEF28, ARPC5, CACNA1G, CACNA1I, CACNB2, CAMK2D, CAP2, CLASP1, CLASP2, CNKSR2, CNTN1, COL4A4, COL4A5, COL5A1, COL6A6, CSK, CSNK2A1, CUL3, DAB1, DCC, DCX, DLG3, DOCK1, DUSP16, DUSP5, DUSP8, EFNB1, EHHADH, EPHA1, EPHA2, EPHB1, EPHB4, ERBB2, EVL, FARP2, FGA, FGB, FGF2, FGF7, FGG, FN1, FRS2, GAB1, GAB2, GAP43, GFRA2, GRB7, GRI…
Generic Transcription Pathway	0.0022	24.2152	324	[ACTL6B, AGO2, APOE, AR, ARID1A, ARID3A, ARID4B, ASH2L, ASUN, ATAD2, ATM, AURKB, AXIN1, BAZ1B, BCL6, BDP1, BLM, BRCA1, BRD1, BRD7, BRF1, CBX8, CCND2, CDC25C, CDC40, CDK13, CDKN1A, CDKN1B, CDKN2B, CHD3, CNOT1, CNOT6, COX5B, CPSF1, CR1, CSNK2A1, CSTF3, CTGF, CTSK, CTSL, DHX38, DICER1, DNA2, DNMT1, DNMT3A, DNMT3B, DROSHA, E2F7, E2F8, EHMT2, EIF4A3, ELL, ELOA2, EP300, ERBB2, ERCC2, ESR2, EXO1, EZH2, …
Classical antibody-mediated complement activation	0.016	100	6	[C1QA, C1QB, C1QC, C1R, C1S, CRP]
Histidine, lysine, phenylalanine, tyrosine, proline and tryptophan catabolism	0.018	11.6667	42	[AADAT, AASS, ACAT1, ALDH9A1, APIP, ASL, ASNS, BCKDK, CPS1, DAO, DCT, DLST, DUOX2, FOLH1B, GADL1, HAL, HNMT, KYAT1, KYAT3, LARS, MTR, NAT8L, OCA2, PAPSS2, PDHA2, PRODH, PRODH2, PSMA1, PSMB11, PSMB8, PSMC5, PSMD1, PSMD13, PSMD9, PSME4, PYCRL, RPL17, RPL19, RPL8, RPS11, SARDH, SARS]
Activation of C3 and C5	0.021	87.5	7	[C2, C3, C4A, C4B, C5, CFB, CFP]
Transport and synthesis of PAPS	0.022	6.55738	8	[HNMT, LARS, PAPSS2, RPL17, RPL19, RPL8, RPS11, SARS]
Inhibition of the proteolytic activity of APC/C required for the onset of anaphase by mitotic spindle checkpoint components	0.032	6.72269	8	[ANAPC2, CDKN1A, CDKN1B, CDKN2B, EHMT2, JUN, NEK2, STAT3]

## Sheet: IDs based on >1pept
GOTerm	Term PValue Corrected with Bonferroni	% Associated Genes	Nr. Genes	Associated Genes Found
Complement cascade	1.6e-27	57.8947	33	[C1QA, C1QB, C1QC, C1R, C1S, C2, C3, C4A, C4B, C4BPA, C4BPB, C5, C6, C7, C8A, C8B, C8G, C9, CFB, CFH, CFHR1, CFHR2, CFI, CLU, CPN1, CPN2, CR1, CRP, F2, FCN3, PROS1, SERPING1, VTN]
Platelet degranulation	1.9e-14	26.4	33	[A1BG, A2M, AHSG, ALB, APOA1, APOH, CLU, ECM1, F5, F8, FGA, FGB, FGG, FN1, HRG, HSPA5, ITIH3, ITIH4, KNG1, LGALS3BP, ORM1, ORM2, PLG, PROS1, SERPINA1, SERPINA3, SERPINF2, SERPING1, STXBP2, TF, TTN, VEGFC, VWF]
Scavenging of heme from plasma	1.7e-11	84.6154	11	[ALB, AMBP, APOA1, APOL1, HBA1, HBB, HP, HPR, HPX, JCHAIN, LRP1]
Intrinsic Pathway of Fibrin Clot Formation	4.5e-11	43.5897	17	[A2M, F12, F13B, F2, F5, F8, F9, FGA, FGB, FGG, KLKB1, KNG1, PROS1, SERPINC1, SERPIND1, SERPING1, VWF]
Terminal pathway of complement	2.5e-09	100	8	[C5, C6, C7, C8A, C8B, C8G, C9, CLU]
Signaling by TGF-beta Receptor Complex	3e-07	13.2013	40	[AHSG, ALB, APOA1, APOA2, APOB, APOE, APOL1, C3, C4A, C4B, CHGB, CP, EP300, F2, F5, FBN1, FGA, FGG, FN1, FUCA2, HSP90B1, IGFALS, ITIH2, KMT2D, KNG1, LAMC1, LTBP1, MEPE, MTMR4, NCOR1, NCOR2, PAPPA2, PLG, RCN1, SERPINA1, SERPINC1, SERPIND1, SPP1, TF, USP15]
Classical antibody-mediated complement activation	1.1e-06	100	6	[C1QA, C1QB, C1QC, C1R, C1S, CRP]
Laminin interactions	3e-06	26.7857	15	[COL4A5, COL4A6, COL5A1, CRK, DOCK7, FN1, GAB1, ITGB1, LAMA2, LAMA4, LAMA5, LAMC1, LAMC3, PTK2, RAPGEF1]
Activation of C3 and C5	3e-05	75	6	[C2, C3, C4A, C4B, C5, CFB]
HDL assembly	4.1e-05	47.0588	8	[A2M, APOA1, APOA2, APOB, APOC1, APOC2, APOC3, APOE]
GRB2:SOS provides linkage to MAPK signaling for Integrins	0.00025	46.6667	7	[CRK, FGA, FGB, FGG, FN1, PTK2, VWF]
Heparan sulfate/heparin (HS-GAG) metabolism	0.003	9.94318	35	[AASDHPPT, ACACA, APOA1, APOA2, APOB, APOC2, APOC3, APOE, APOM, CNGB1, COL4A5, COL4A6, COL5A1, CUBN, DMD, FN1, HSD17B1, ITGB1, LAMA2, LAMA4, LAMA5, LAMC1, LAMC3, LRP1, LRP2, LUM, MMADHC, MTHFD1L, MYO7A, NDST1, PANK2, PARP9, RBP4, TTR, VTN]
IRS-mediated signalling	0.0038	5.96583	206	[A1BG, ABCA12, ABCA3, ABCB10, ABCD1, ACLY, ADCY10, ADCY2, AGT, AHCYL1, AHSG, ALB, ALMS1, ANPEP, APOA1, APOB, AR, ATP6V1C2, B2M, BCR, BLM, BRWD1, C1QA, C1QB, C1QC, C1R, C1S, C2, C3, C4A, C4B, C4BPA, C4BPB, C5, C6, C7, C8A, C8B, C8G, C9, CACNA1I, CACNB2, CCAR2, CDKN1B, CENPI, CENPU, CEP131, CFB, CFH, CFHR1, CFHR2, CFI, CFTR, CHD3, CILP, CLU, COL4A5, COL5A1, COL6A6, CPN1, CPN2, CR1, CRK, CRP, DCAF13…
Binding and Uptake of Ligands by Scavenger Receptors	0.035	7.74963	52	[ALB, ALPP, AMBP, ANK2, ANK3, APOA1, APOB, APOE, APOL1, CFTR, CTTN, CYTH1, DENND2A, DYNC1H1, F5, F8, FNBP1, FNBP1L, GOLGB1, HBA1, HBB, HP, HPR, HPX, HSP90B1, JCHAIN, KIF11, KIF1B, KIF26A, KIF26B, KIF3B, LRP1, LRP2, MYH2, MYH6, MYH7B, MYO5A, RABGEF1, SAA1, SCARF1, SEC24C, SERPINA1, SH3D19, SORT1, SPTA1, SPTAN1, SPTBN1, STAB1, STAB2, STON2, TF, WNT5A]
